# Supplementary material
Source: PubMed Central journal article supplement (PMC3262665)

## **Type 2 deiodinase and host responses of sepsis and acute lung injury**

Shwu-Fan Ma<sup>1\*</sup>; Lishi Xie<sup>2\*</sup>; Maria Pino-Yanes<sup>3,4\*</sup>; Saad Sammani<sup>2</sup>; Michael S. Wade<sup>2</sup>; Eleftheria Letsiou<sup>2</sup>; Jessica Siegler<sup>2</sup>; Ting Wang<sup>2</sup>; Giovanni Infusino<sup>2</sup>; Rick A. Kittles<sup>5</sup>; Carlos Flores<sup>3,4</sup>; Tong Zhou<sup>2</sup>; Bellur S. Prabhakar<sup>6</sup>; Liliana Moreno-Vinasco<sup>2</sup>; Jesus Villar<sup>3,7,8</sup>; Jeffrey R. Jacobson<sup>2</sup>; Steven M. Dudek<sup>2</sup>; Joe G. N. Garcia<sup>2\*\*</sup>

### **Online Supplement (Detailed Materials and Methods)**

#### **NCBI genome-wide expression profiles of preclinical murine ALI models.**

We evaluated four previously deposited microarray datasets: GSE2368 (1), GSE11662 (2), GSE9368 (3), and GSE14525 (4) in the National Center for Biotechnology Information Gene Expression Omnibus repository. These datasets were generated in spontaneously breathing (SB) mice; mice exposed to LPS (1 mg/kg, intratracheal delivery) for 1, 2, and 18 h or to MV with tidal volumes of 17 ml/kg for 6 h (GSE2368), 30 ml/kg for 4 h (GSE11662), or 40 ml/kg for 4 h (GSE9368, GSE14525). Expressions were profiled using Affymetrix platform and signal intensities normalized using Robust Multi-Array algorithm in R package `affy` (<http://www.bioconductor.org>) and expressed as  $\log_2$  values. Spearman ranked correlation test was performed on LPS and VILI datasets where  $p < 0.001$  is considered significant.

#### ***In vivo* DIO2 silencing (siDIO2) and animal models.**

For *in vivo* silencing, custom designed siRNA (5'-GAAGUUGGCUGGAGAAGAAUU-3') targeting murine *Dio2* was synthesized with siSTABLE modification by Dharmacon (Lafayette, CO). C57B6 mice were pre-treated intratracheally (i.t.) with 10 mg/kg siDIO2 for 72 h followed by 1 mg/kg LPS i.t. challenge for 18 h (LPS model) or by 30 ml/kg ventilation, 70 breaths/min and positive expiratory pressure of 0 cm H<sub>2</sub>O for 4 h (VILI model). Vehicle control (CTRL)

and scramble siRNA (siCTRL) were used as controls. BAL, lungs, blood and plasma were extracted for further analyses. All animal procedures conformed to the principles for laboratory animal research outlined by the Animal Welfare Act and the National Institutes of Health guidelines for the experimental use of animals and approved by University of Illinois at Chicago Animal Care and Use Committee.

#### **BAL protein and leukocytes analysis in murine lungs.**

Mice underwent BAL extraction from both lungs with Hank's balanced salt solution (1 ml/mouse), and recovered BAL fluids were assayed as previously described (5). BAL protein concentrations were measured with a BCA Protein assay kit (Bio-Rad, Hercules, CA). Leukocytes in the cell pellet were counted by cytocentrifugation and Diff-Quik staining (Dade Behring Inc., Newark, DE).

**Western blot analysis.** Lung lysates were prepared as previously described (1-3). Immunoreactivity was assessed with an anti-D2 polyclonal antibody (1:500, H-165, Santa Cruz) or an anti-actin antibody (1:50000, A3854, Sigma). Proteins were detected using an enhanced chemoluminescence system (Pierce, Rockford, IL). Integrated densities of bands were quantified using ImageJ software (Research Services Branch, Bethesda, MD).

#### **Prohormone thyroxine (T4) and thyroid stimulating hormone (TSH) levels in plasma.**

Mouse blood was harvested via the right carotid artery, and plasma was collected by centrifugation. T4 levels were measured using DRI® Thyroxine Assay kit

(Antech Diagnostics, Oak Brook, IL) following manufacturer's protocol. TSH levels were assessed via immunoradiometric assay with an iodine-labeled monoclonal antibody and a second monoclonal antibody recognizing a distinct TH epitope.

**Endothelial Cell Cultures and Cyclic Stretch Studies.** Human pulmonary microvascular ECs were obtained from Cambrex Corp. (Walkersville, MD) and cultured at 37°C in a humidified atmosphere of 5% CO<sub>2</sub> and 95% air as in prior studies ((6). For cyclic stretch experiments, confluent ECs were exposed to 18% cyclic stretch (CS) or static conditions for 24 h. D2 content in cell lysates was analysed by western blotting from control and 18% CS-challenged ECs as described previously (7).

**Study populations and demographics.** Genotyping was conducted in DNA obtained from 327 European-Americans (EAs)(188 controls, 139 cases with severe sepsis including 78 with ALI) and 261 African-Americans (AAs)(187 controls, 74 cases with severe sepsis including 41 with ALI). Severe sepsis and ALI were defined using the American–European Consensus Criteria (8) and the Society of Critical Care Medicine Consensus statements (9). Demographic and clinical information including source of infection, co-morbidities, and APACHE II scores were recorded to ensure comparability of the severity of illness between ALI and sepsis groups. Control subjects were drawn from the population and were free of lung inflammation, transplant, diabetes, and cancer based on medical record review. This study was approved by the University of Chicago IRB. Informed consent was obtained from all subjects.

**SNP selection and genotyping.** TagIT 3.03 software (10) was used to select a set of 10 cosmopolitan tagging SNPs (tSNPs) from HapMap phase II data (11-12). Genotyping was conducted using the iPLEX Gold™ Platform following manufacturer's

protocol (Sequenom, San Diego, CA). A TaqMan™ allelic discrimination assay (Applied Biosystems, Foster City, CA) was used to validate the associated SNP.

**Assessment of population stratification among case-control samples.** EAs were genotyped for 93 ancestry informative markers (AIMs) covering the largest features of the European North-Northwest–South-Southeast axis of differentiation (13). AAs were genotyped for 96 AIMs selected with average allele frequency differences >0.6 among European, West African and Native American/Asian populations (14-15). EIGENSOFT was used to perform principal component analysis (PCA) (16). Previously published reference data from 163 Swedish, 57 Polish, 76 English, 119 Italians, 68 Greeks, and 55 Spanish (13), as well as from Utah residents with ancestry from northern and western Europe (CEU) (11) were used for EA PCA analysis, whereas data from CEU and Yoruba in Ibadan, Nigeria (YRI) were for AA PCA analysis (11).

**Statistical analysis.** *In vivo* animal results were analyzed using one-way ANOVA; paired groups were compared by Newman-Keuls test. Results are expressed as mean ± SE. Three to five mice were used in each experimental group. Demographics were compared by two-tailed Mann-Whitney test, and all groups were compared across diagnosis groups by one-way ANOVA. Survival rates were compared by chi-square tests. Departures from Hardy-Weinberg equilibrium (HWE) were calculated using the Exact test (17) and significant departures were set at  $p \leq 0.006$  and  $p \leq 0.005$  for EAs and AAs respectively, based on the number of tests performed. Direct association of tSNPs with disease was assessed using the Cochran-Armitage trend test assuming an additive model and the empirical  $p$ -value obtained by 1000 permutations.

Both HWE and trend test statistics were computed by means of a custom script for STATISTICA (StatSoft Inc., Tulsa, OK). Multiple logistic regression analysis was used to adjust for age and sex and for population stratification including the first principal component (PC1) scores derived from PCAs using SPSS 14.0 (SPSS Inc., Chicago, IL). SPSS was also used to estimate the odds ratio (OR) and 95% confidence intervals (CI). Testing UNTyped Alleles software (TUNA) ver. 1.1 (18) was used to estimate allele frequencies of untyped SNPs in all samples and to perform indirect association testing of untyped SNPs with minor allele frequency (MAF)  $\geq 5\%$  and multilocus LD values ( $M_D$ )  $\geq 0.7$ . PHASE 2.1 (19) was used to estimate the *DIO2* haplotypes from CEU

and YRI data that were subsequently employed by TUNA as a reference for the underlying linkage disequilibrium (LD) across gene variants in the two populations. To judge the significant SNP associations in the context of the multiple comparisons performed, a False Discovery Rate was assessed by QVALUE (20), considering the two conditions tested (*i.e.* severe sepsis and sepsis associated-ALI) and the two populations. EPIDAT 3.0 (<http://dxsp.sergas.es>) was used to perform a joint analysis using Mantel-Haenszel test. Haplotype associations were tested using Hapstats software (21). Statistical significance was set at  $p \leq 0.05$ .

## REFERENCES

1. Ma SF, Grigoryev DN, Taylor AD, Nonas S, Sammani S, Ye SQ, Garcia JG. Bioinformatic identification of novel early stress response genes in rodent models of lung injury. *Am J Physiol Lung Cell Mol Physiol*. 2005;289(3):L468-77.
2. Meyer NJ, Huang Y, Singleton PA, Sammani S, Moitra J, Evenoski CL, Husain AN, Mitra S, Moreno-Vinasco L, Jacobson JR, Lussier YA, Garcia JG. GADD45a is a novel candidate gene in inflammatory lung injury via influences on Akt signaling. *Faseb J*. 2009;23(5):1325-37.
3. Hong SB, Huang Y, Moreno-Vinasco L, Sammani S, Moitra J, Barnard JW, Ma SF, Mirzapioazova T, Evenoski C, Reeves RR, Chiang ET, Lang GD, Husain AN, Dudek SM, Jacobson JR, Ye SQ, Lussier YA, Garcia JG. Essential role of pre-B-cell colony enhancing factor in ventilator-induced lung injury. *Am J Respir Crit Care Med*. 2008;178(6):605-17.
4. Mirzapioazova T, Moitra J, Moreno-Vinasco L, Sammani S, Turner JR, Chiang ET, Evenoski C, Wang T, Singleton PA, Huang Y, Lussier YA, Watterson DM, Dudek SM, Garcia JG. Non-muscle myosin light chain kinase isoform is a viable molecular target in acute inflammatory lung injury. *American journal of respiratory cell and molecular biology*. 2010;44(1):40-52.
5. Peng X, Hassoun PM, Sammani S, McVerry BJ, Burne MJ, Rabb H, Pearse D, Tudor RM, Garcia JG. Protective effects of sphingosine 1-phosphate in murine endotoxin-induced inflammatory lung injury. *Am J Respir Crit Care Med*. 2004;169(11):1245-51.
6. Garcia JG, Liu F, Verin AD, Birukova A, Dechert MA, Gerthoffer WT, Bamburg JR, English D. Sphingosine 1-phosphate promotes endothelial cell barrier integrity by

- Edg-dependent cytoskeletal rearrangement. *The Journal of clinical investigation*. 2001;108(5):689-701.
7. Stathatos N, Levetan C, Burman KD, Wartofsky L. The controversy of the treatment of critically ill patients with thyroid hormone. *Best practice & research*. 2001;15(4):465-78.
  8. Bernard GR, Artigas A, Brigham KL, Carlet J, Falke K, Hudson L, Lamy M, Legall JR, Morris A, Spragg R. The American-European Consensus Conference on ARDS. Definitions, mechanisms, relevant outcomes, and clinical trial coordination. *Am J Respir Crit Care Med*. 1994;149(3 Pt 1):818-24.
  9. American College of Chest Physicians/Society of Critical Care Medicine Consensus Conference: definitions for sepsis and organ failure and guidelines for the use of innovative therapies in sepsis. *Crit Care Med*. 1992;20(6):864-74.
  10. Weale ME, Depondt C, Macdonald SJ, Smith A, Lai PS, Shorvon SD, Wood NW, Goldstein DB. Selection and evaluation of tagging SNPs in the neuronal-sodium-channel gene SCN1A: implications for linkage-disequilibrium gene mapping. *Am J Hum Genet*. 2003;73(3):551-65.
  11. Frazer KA, Ballinger DG, Cox DR, Hinds DA, Stuve LL, Gibbs RA, Belmont JW, Boudreau A, Hardenbol P, Leal SM, Pasternak S, Wheeler DA, Willis TD, Yu F, Yang H, Zeng C, Gao Y, Hu H, Hu W, Li C, Lin W, Liu S, Pan H, Tang X, Wang J, Wang W, Yu J, Zhang B, Zhang Q, Zhao H, Zhao H, Zhou J, Gabriel SB, Barry R, Blumenstiel B, Camargo A, Defelice M, Faggart M, Goyette M, Gupta S, Moore J, Nguyen H, Onofrio RC, Parkin M, Roy J, Stahl E, Winchester E, Ziaugra L, Altshuler D, Shen Y, Yao Z, Huang W, Chu X, He Y, Jin L, Liu Y, Shen Y, Sun W, Wang H, Wang Y, Wang Y, Xiong X, Xu L, Waye MM, Tsui SK, Xue H, Wong JT, Galver LM, Fan JB, Gunderson K, Murray SS, Oliphant AR, Chee MS, Montpetit A, Chagnon F, Ferretti V, Leboeuf M, Olivier JF, Phillips MS, Roumy S, Sallee C, Verner A, Hudson TJ, Kwok PY, Cai D, Koboldt DC, Miller RD, Pawlikowska L, Taillon-Miller P, Xiao M, Tsui LC, Mak W, Song YQ, Tam PK, Nakamura Y, Kawaguchi T, Kitamoto T, Morizono T, Nagashima A, Ohnishi Y, Sekine A, Tanaka T, Tsunoda T, Deloukas P, Bird CP, Delgado M, Dermitzakis ET, Gwilliam R, Hunt S, Morrison J, Powell D, Stranger BE, Whittaker P, Bentley DR, Daly MJ, de Bakker PI, Barrett J, Chretien YR, Maller J, McCarroll S, Patterson N, Pe'er I, Price A, Purcell S, Richter DJ, Sabeti P, Saxena R, Schaffner SF, Sham PC, Varilly P, Altshuler D, Stein LD, Krishnan L, Smith AV, Tello-Ruiz MK, Thorisson GA, Chakravarti A, Chen PE, Cutler DJ, Kashuk CS, Lin S, Abecasis GR, Guan W, Li Y, Munro HM, Qin ZS, Thomas DJ, McVean G, Auton A, Bottolo L, Cardin N, Eyheramendy S, Freeman C, Marchini J, Myers S, Spencer C, Stephens M, Donnelly P, Cardon LR, Clarke G, Evans DM, Morris AP, Weir BS, Tsunoda T, Mullikin JC, Sherry ST, Feolo M, Skol A, Zhang H, Zeng C, Zhao H, Matsuda I, Fukushima Y, Macer DR, Suda E, Rotimi CN, Adebamowo CA, Ajayi I, Aniagwu T, Marshall PA, Nkwodimmah C, Royal CD, Leppert MF, Dixon M, Peiffer A, Qiu R, Kent A, Kato K, Niikawa N, Adewole IF, Knoppers BM, Foster MW, Clayton EW, Watkin J, Gibbs RA, Belmont JW, Muzny D, Nazareth L, Sodergren E, Weinstock GM, Wheeler DA, Yakub I, Gabriel SB, Onofrio RC, Richter DJ, Ziaugra L, Birren BW, Daly MJ, Altshuler D, Wilson RK, Fulton LL, Rogers J, Burton J, Carter NP, Clee CM, Griffiths M, Jones MC, McLay K, Plumb RW, Ross MT, Sims SK, Willey

- DL, Chen Z, Han H, Kang L, Godbout M, Wallenburg JC, L'Archeveque P, Bellemare G, Saeki K, Wang H, An D, Fu H, Li Q, Wang Z, Wang R, Holden AL, Brooks LD, McEwen JE, Guyer MS, Wang VO, Peterson JL, Shi M, Spiegel J, Sung LM, Zacharia LF, Collins FS, Kennedy K, Jamieson R, Stewart J. A second generation human haplotype map of over 3.1 million SNPs. *Nature*. 2007;449(7164):851-61.
12. Flores C, Ma SF, Maresso K, Ober C, Garcia JG. A variant of the myosin light chain kinase gene is associated with severe asthma in African Americans. *Genet Epidemiol*. 2007;31(4):296-305.
  13. Price AL, Butler J, Patterson N, Capelli C, Pascali VL, Scarnicci F, Ruiz-Linares A, Groop L, Saetta AA, Korkolopoulou P, Seligsohn U, Waliszewska A, Schirmer C, Ardlie K, Ramos A, Nemesh J, Arbeitman L, Goldstein DB, Reich D, Hirschhorn JN. Discerning the ancestry of European Americans in genetic association studies. *PLoS Genet*. 2008;4(1):e236.
  14. Tian C, Hinds DA, Shigeta R, Adler SG, Lee A, Pahl MV, Silva G, Belmont JW, Hanson RL, Knowler WC, Gregersen PK, Ballinger DG, Seldin MF. A genomewide single-nucleotide-polymorphism panel for Mexican American admixture mapping. *Am J Hum Genet*. 2007;80(6):1014-23.
  15. Tian C, Hinds DA, Shigeta R, Kittles R, Ballinger DG, Seldin MF. A genomewide single-nucleotide-polymorphism panel with high ancestry information for African American admixture mapping. *Am J Hum Genet*. 2006;79(4):640-9.
  16. Price AL, Patterson NJ, Plenge RM, Weinblatt ME, Shadick NA, Reich D. Principal components analysis corrects for stratification in genome-wide association studies. *Nat Genet*. 2006;38(8):904-9.
  17. Wigginton JE, Cutler DJ, Abecasis GR. A note on exact tests of Hardy-Weinberg equilibrium. *Am J Hum Genet*. 2005;76(5):887-93.
  18. Wen X, Nicolae DL. Association studies for untyped markers with TUNA. *Bioinformatics*. 2008;24(3):435-7.
  19. Stephens M, Smith NJ, Donnelly P. A new statistical method for haplotype reconstruction from population data. *Am J Hum Genet*. 2001;68(4):978-89.
  20. Storey JD, Tibshirani R. Statistical significance for genomewide studies. *Proc Natl Acad Sci U S A*. 2003;100(16):9440-5.
  21. Zeng D, Lin DY, Avery CL, North KE, Bray MS. Efficient semiparametric estimation of haplotype-disease associations in case-cohort and nested case-control studies. *Biostatistics*. 2006;7(3):486-502.

## SUPPLEMENT FIGURE LEGEND

**Figure E1. Increased DIO2 protein expression in human lung microvascular endothelial cells (HLMV) upon stretch challenge. Panel A.** DIO2 protein and  $\beta$ -actin expression levels were detected by Western blotting from control (static) and 18% cyclic stretch (CS), 24 h challenged HLMV. **Panel B.** Graphical presentation of normalized DIO2 (D2) protein levels to  $\beta$ -actin depicting significant increases of D2 in CS compared with static controls. N=3, \* denotes  $p < 0.05$ .

**Supplement Table E1.** Completion rates and Hardy-Weinberg equilibrium *p*-values for the genotyped *DIO2* tSNPs.

| tSNP       | Position* | Location    | CR†(%) | European Americans |              |              | African Americans |              |       |
|------------|-----------|-------------|--------|--------------------|--------------|--------------|-------------------|--------------|-------|
|            |           |             |        | Controls           | SS‡          | ALI§         | Controls          | SS‡          | ALI§  |
| rs225019   | 79733709  | 3' flanking | 99.8   | NA                 | NA           | NA           | 1.000             | 0.278        | 1.000 |
| rs17110436 | 79735086  | 3' flanking | 99.1   | NA                 | NA           | NA           | 0.572             | 0.583        | 1.000 |
| rs225017   | 79736979  | 3' flanking | 99.8   | 0.769              | <b>0.005</b> | <b>0.007</b> | 0.197             | 1.000        | 1.000 |
| rs225014   | 79739333  | Ala92Thr    | 99.8   | 0.649              | 0.427        | 0.770        | 0.657             | 0.060        | 0.531 |
| rs225011   | 79741961  | Intron 2    | 99.7   | 0.769              | <b>0.005</b> | <b>0.009</b> | 0.140             | 1.000        | 1.000 |
| rs2267872  | 79743426  | Intron 1    | 99.7   | 0.638              | 0.098        | 0.420        | 0.700             | <b>0.020</b> | 0.086 |
| rs2267873  | 79743567  | Intron 1    | 99.8   | 0.408              | 0.068        | 0.255        | 0.356             | 0.331        | 0.508 |
| rs8009555  | 79744267  | Intron 1    | 99.5   | 0.650              | 0.119        | 0.420        | 0.347             | 1.000        | 1.000 |
| rs6574551  | 79744287  | Intron 1    | 97.4   | 0.665              | 0.147        | 0.433        | 0.134             | 1.000        | 0.450 |
| rs12885300 | 79748019  | 5' flanking | 99.5   | 0.525              | <b>0.004</b> | <b>0.016</b> | 0.102             | 0.545        | 1.000 |

\*According to NCBI build 36.3.

†Completion rate.

‡Severe sepsis.

§Acute lung injury.

Nominal significant departures from HWE in bold.

NA, Not assessed since the SNP was found monomorphic in the EA population.

Supplement Table E2. Association of *DIO2* SNPs (tagging and untyped) with severe sepsis and severe sepsis-associated ALI.

| #         | SNP               | Position <sup>†</sup> | Location <sup>†</sup> | European Americans     |                            |                            |                                    |                         | African Americans      |              |               |                                    |                         | Joint analysis  |              |
|-----------|-------------------|-----------------------|-----------------------|------------------------|----------------------------|----------------------------|------------------------------------|-------------------------|------------------------|--------------|---------------|------------------------------------|-------------------------|-----------------|--------------|
|           |                   |                       |                       | Minor allele frequency |                            |                            | <i>p</i> -value ( <i>q</i> -value) |                         | Minor allele frequency |              |               | <i>p</i> -value ( <i>q</i> -value) |                         | <i>p</i> -value |              |
|           |                   |                       |                       | Controls<br>(N=188)    | SS <sup>‡</sup><br>(N=139) | ALI <sup>§</sup><br>(N=78) | SS                                 | ALI                     | Controls<br>(N=187)    | SS<br>(N=74) | ALI<br>(N=41) | SS                                 | ALI                     | SS              | ALI          |
| <u>1</u>  | <u>rs225019</u>   | 79733709              | 3'flanking            | <0.01                  | 0.00                       | 0.00                       | NA                                 | NA                      | 0.08                   | 0.07         | 0.07          | 0.710<br>(0.317)                   | 0.824<br>(0.317)        | NA              | NA           |
| <u>2</u>  | <u>rs17110436</u> | 79735086              | 3'flanking            | <0.01                  | 0.00                       | 0.00                       | NA                                 | NA                      | 0.15                   | 0.12         | 0.10          | 0.375<br>(0.317)                   | 0.273<br>(0.317)        | NA              | NA           |
| <u>3</u>  | <u>rs225017</u>   | 79736979              | 3'flanking            | 0.46                   | 0.42                       | 0.38                       | 0.328<br>(0.317)                   | 0.083<br>(0.140)        | 0.17                   | 0.14         | 0.19          | 0.359<br>(0.317)                   | 0.714<br>(0.317)        | 0.728           | 0.112        |
| 4         | rs225015          | 79737332              | 3'flanking            | 0.34                   | 0.26                       | 0.22                       | <b>0.009</b><br>(0.030)            | <b>0.003</b><br>(0.020) | 0.39                   | 0.34         | 0.34          | 0.288<br>(0.317)                   | 0.365<br>(0.317)        | <b>0.015</b>    | <b>0.010</b> |
| 5         | rs7140952         | 79738025              | 3'flanking            | 0.09                   | 0.09                       | 0.08                       | 0.841<br>(0.317)                   | 0.882<br>(0.327)        | 0.24                   | 0.19         | 0.16          | 0.129<br>(0.184)                   | 0.084<br>(0.140)        | 0.450           | 0.197        |
| <u>6</u>  | <u>rs225014</u>   | 79739333              | Exon 3<br>(Thr92Ala)  | 0.40                   | 0.31                       | 0.26                       | <b>0.009</b><br>(0.030)            | <b>0.004</b><br>(0.020) | 0.44                   | 0.44         | 0.46          | 0.926<br>(0.337)                   | 0.726<br>(0.317)        | 0.057           | <b>0.038</b> |
| 7         | rs225013          | 79739682              | Intron 2              | 0.50                   | 0.40                       | 0.35                       | <b>0.028</b><br>(0.080)            | <b>0.001</b><br>(0.020) | 0.24                   | 0.24         | 0.27          | 0.949<br>(0.339)                   | 0.657<br>(0.317)        | 0.057           | <b>0.024</b> |
| <u>8</u>  | <u>rs225011</u>   | 79741961              | Intron 2              | 0.46                   | 0.41                       | 0.39                       | 0.267<br>(0.317)                   | 0.109<br>(0.168)        | 0.33                   | 0.35         | 0.37          | 0.615<br>(0.317)                   | 0.541<br>(0.317)        | 0.241           | 0.119        |
| 9         | rs225010          | 79742032              | Intron 2              | 0.43                   | 0.35                       | 0.31                       | <b>0.033</b><br>(0.083)            | <b>0.002</b><br>(0.020) | 0.33                   | 0.35         | 0.37          | 0.617<br>(0.317)                   | 0.598<br>(0.317)        | 0.204           | 0.088        |
| <u>10</u> | <u>rs2267872</u>  | 79743426              | Intron 1              | 0.09                   | 0.09                       | 0.08                       | 0.783<br>(0.317)                   | 0.787<br>(0.317)        | 0.11                   | 0.10         | 0.12          | 0.739<br>(0.317)                   | 0.566<br>(0.317)        | 0.943           | 0.906        |
| <u>11</u> | <u>rs2267873</u>  | 79743567              | Intron 1              | 0.10                   | 0.11                       | 0.12                       | 0.612<br>(0.317)                   | 0.560<br>(0.317)        | 0.39                   | 0.40         | 0.38          | 0.838<br>(0.317)                   | 0.817<br>(0.317)        | 0.679           | 0.884        |
| <u>12</u> | <u>rs8009555</u>  | 79744267              | Intron 1              | 0.09                   | 0.10                       | 0.08                       | 0.695<br>(0.317)                   | 0.745<br>(0.317)        | 0.26                   | 0.29         | 0.24          | 0.552<br>(0.317)                   | 0.641<br>(0.317)        | 0.517           | 0.594        |
| <u>13</u> | <u>rs6574551</u>  | 79744287              | Intron 1              | 0.09                   | 0.10                       | 0.09                       | 0.700<br>(0.317)                   | 0.827<br>(0.317)        | 0.33                   | 0.34         | 0.30          | 0.666<br>(0.317)                   | 0.594<br>(0.317)        | 0.599           | 0.575        |
| 14        | rs1388378         | 79744725              | Intron 1              | 0.09                   | 0.10                       | 0.09                       | 0.707<br>(0.317)                   | 0.836<br>(0.317)        | 0.26                   | 0.29         | 0.24          | 0.560<br>(0.317)                   | 0.639<br>(0.317)        | 0.499           | 0.714        |
| <u>15</u> | <u>rs12885300</u> | 79748019              | 5' flanking           | 0.36                   | 0.37                       | 0.41                       | 0.676<br>(0.317)                   | 0.305<br>(0.317)        | 0.06                   | 0.10         | 0.12          | 0.073<br>(0.140)                   | <b>0.039</b><br>(0.087) | 0.300           | 0.083        |

\*Nomenclature used in Figure 5.

<sup>†</sup>According to NCBI build 36.3.

<sup>‡</sup>Severe sepsis.

<sup>§</sup>Severe sepsis-associated acute lung injury.

tSNPs in bold and underlined; nominal significant associations in bold.

NA; not tested for association since MAF was below 5% in the sample.



Supplement Table E3. Genotyped *DIO2* SNPs, MAFs and unadjusted *p*-values for association with survival among severe sepsis patients.

| dbSNP ID   | European Americans     |                |                  | African Americans      |                |                  |
|------------|------------------------|----------------|------------------|------------------------|----------------|------------------|
|            | Minor allele frequency |                | <i>p</i> -value* | Minor allele frequency |                | <i>p</i> -value* |
|            | Alive<br>(N=88)        | Dead<br>(N=51) |                  | Alive<br>(N=46)        | Dead<br>(N=28) |                  |
| rs225019   | 0.00                   | 0.00           | NA               | 0.08                   | 0.05           | 0.513            |
| rs17110436 | 0.00                   | 0.00           | NA               | 0.12                   | 0.13           | 0.872            |
| rs225017   | 0.41                   | 0.44           | 0.557            | 0.15                   | 0.11           | 0.468            |
| rs225014   | 0.30                   | 0.31           | 0.792            | 0.46                   | 0.41           | 0.557            |
| rs225011   | 0.40                   | 0.44           | 0.475            | 0.33                   | 0.39           | 0.482            |
| rs2267872  | 0.10                   | 0.09           | 0.692            | 0.12                   | 0.07           | 0.347            |
| rs2267873  | 0.11                   | 0.12           | 0.804            | 0.40                   | 0.39           | 0.874            |
| rs8009555  | 0.10                   | 0.10           | 0.907            | 0.31                   | 0.25           | 0.382            |
| rs6574551  | 0.10                   | 0.10           | 0.960            | 0.39                   | 0.25           | 0.103            |
| rs12885300 | 0.34                   | 0.43           | 0.161            | 0.11                   | 0.09           | 0.589            |

\**p*-value calculated using allelic trend test.

**Supplement Table E4.** Association of haplotypes (>5%) of *DIO2* SNPs rs225014 and rs12885300 with Severe Sepsis and Severe Sepsis-Associated ALI.

| Haplotype* | European American  |               |               |              |              | African American   |              |               |          |        |
|------------|--------------------|---------------|---------------|--------------|--------------|--------------------|--------------|---------------|----------|--------|
|            | Frequency          |               |               | p-value†     |              | Frequency          |              |               | p-value† |        |
|            | Control<br>(N=190) | SS<br>(N=143) | ALI<br>(N=77) | CvsSS        | CvsALI       | Control<br>(N=188) | SS<br>(N=75) | ALI<br>(N=41) | CvsSS    | CvsALI |
| A-T        | 0.328              | 0.360         | 0.394         | 0.398        | 0.134        | 0.056              | 0.088        | 0.098         | 0.111    | 0.073  |
| A-C        | 0.271              | 0.334         | 0.343         | 0.069        | 0.089        | 0.502              | 0.478        | 0.439         | 0.639    | 0.293  |
| G-C        | 0.373              | 0.292         | 0.246         | <b>0.026</b> | <b>0.005</b> | 0.441              | 0.421        | 0.439         | 0.733    | 0.885  |

\*SNP order is rs225014-rs12885300

†p-value is unadjusted

Figure E1.

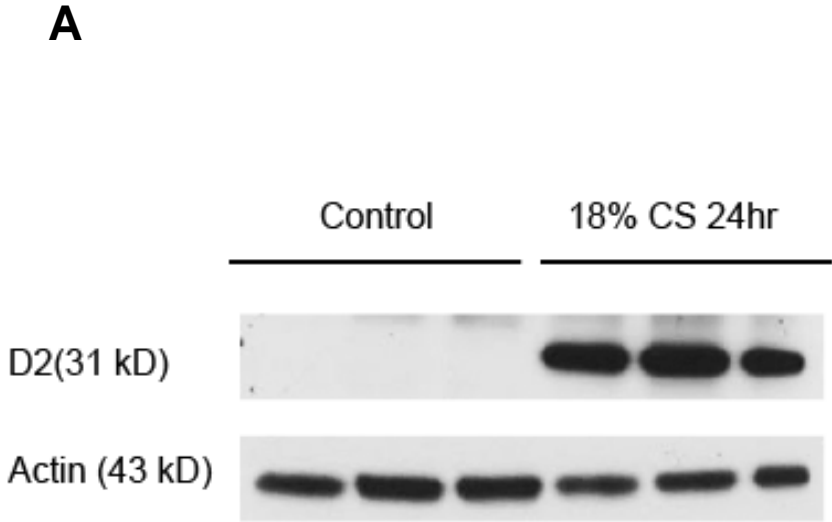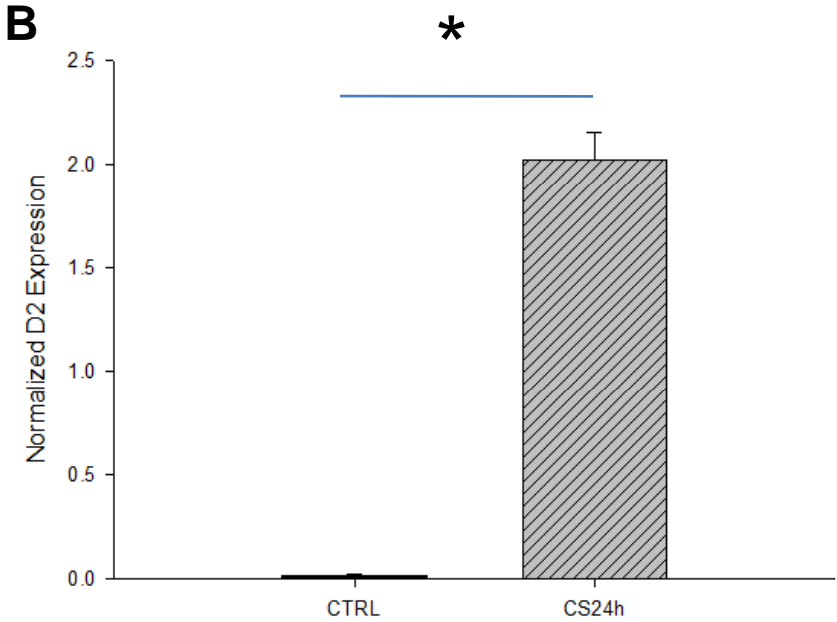

Supplement: supp_45.6.1203_Ma_ODS.pdf [file supp_45.6.1203_Ma_ODS.pdf]
